# Supplementary material for: RNA polymerase II stalling at pre-mRNA splice sites is enforced by ubiquitination of the catalytic subunit
Source: eLife. 2017 Oct 13;6:e27082. doi: 10.7554/eLife.27082 (PMC5673307; doi:10.7554/eLife.27082)
Supplement: Figure 1—source data 1. [file elife-27082-fig1-data1.xlsx]

## Sheet: Sheet1
	BY	BY	BY	BY	BY	BY	Nab3	Nab3	Nab3	Nab3	Nab3	Nab3	Bre5	Bre5	Bre5	Bre5	Bre5	Bre5	BY UB signal -BG	BY B signal -BG	Bre5 UB signal -BG	Bre5 B signal -BG	Nab3 UB signal -BG	Nab3 B signal -BG
RNA	Unbound	Background	signal - background	Bound	Background	signal - background	Unbound	Background	signal - background	Bound	Background	signal - background	Unbound	Background	signal - background	Bound	Background	signal - background	all divided by Bre5 binding to RNA9
1	3671877724	1888423921	1783453803	1941450217	1888423921	53026296	45464.2	31528	13936.2	14328.8	13996.2	332.618	3417768272	1796772324	1620995948	1831946886	1796772324	35174562	2.04096	0.0606826	1.85505	0.0402533	1.04503	0.024942
2	2447939906	1888423921	559515985	2426006754	1888423921	537582833	16751.3	13996.2	2755.09	17781.5	13996.2	3785.27	2232089204	1796772324	435316880	2533373261	1796772324	736600937	0.640303	0.615203	0.498171	0.842957	0.206595	0.283845
3	3528013668	1888423921	1639589747	2378648593	1888423921	490224672	22672.1	13996.2	8675.91	17009.1	13996.2	3012.92	3352658848	1796772324	1555886524	2466719498	1796772324	669947174	1.87633	0.561007	1.78054	0.766679	0.650579	0.225929
4	3661973538	1888423921	1773549617	2252802890	1888423921	364378969	22650.2	13996.2	8653.99	17622.4	13996.2	3626.17	3432353779	1796772324	1635581455	2320817425	1796772324	524045101	2.02963	0.416991	3.92794	0.59971	0.271915	0.271915
5	3939664042	1888423921	2051240121	2011854082	1888423921	123430161	23773.8	13996.2	9777.6	13592.3	13996.2	-403.886	3461658428	1796772324	1664886104	1812563432	1796772324	15791108	2.34741	0.141252	1.90527	0.0180711	0.733191	-0.0302861
6	3541920422	1888423921	1653496501	1993243170	1888423921	104819249	18226.7	13996.2	4230.5	27331.9	13996.2	13335.7	3155789171	1796772324	1359016847	1948012455	1796772324	151240131	1.89224	0.119954	1.55524	0.173077	0.317231	1
7	3782652730	1888423921	1894228809	2297085789	1888423921	408661868	21933.2	13996.2	7936.94	21850	13996.2	7853.75	3208129765	1796772324	1411357441	2435292436	1796772324	638520112	2.16773	0.467667	1.61514	0.730714	0.595166	0.588928
8	3661783623	1888423921	1773359702	2118479784	1888423921	230055863	22552.3	13996.2	8556.13	14566.4	13996.2	570.225	3435810374	1796772324	1639038050	2140704630	1796772324	343932306	2.02941	0.263273	1.87569	0.393592	0.641597	0.0427594
9	3446995047	1888423921	1558571126	2147065123	1888423921	258641202	21476.3	13996.2	7480.03	16296	13996.2	2299.73	2923701902	1796772324	1126929578	2670602466	1796772324	873830142	1.78361	0.295986	1.28964	1	0.560904	0.172449
	Unbound Nab3/BY	Bound Nab3/BY	Unbound Bre5/BY	Bound Bre5/BY
1	7.81416e-06	6.2727e-06	0.908908	0.663342
2	4.92405e-06	7.04128e-06	0.778024	1.37021
3	5.29151e-06	6.146e-06	0.948949	1.36661
4	4.87947e-06	9.95165e-06	0.922208	1.43819
5	4.76668e-06	-3.27218e-06	0.811649	0.127936
6	2.55852e-06	0.000127225	0.821905	1.44287			BY								Nab3
7	4.19006e-06	1.92182e-05	0.745083	1.56247			area	mean	min	max	int dens	raw int dens			area	mean	min	max	int dens	raw int dens
8	4.82481e-06	2.47864e-06	0.924256	1.49499		1	79200	46362.1	23387	62450	3671877724	3671877724		1	1.285	35375.2	16642	56291	45464.2	7274269298
9	4.79929e-06	8.89158e-06	0.723053	3.37854		2	79200	30908.3	18504	46260	2447939906	2447939906		2	1.285	24531.6	16642	41990	31528	5044479606
						3	79200	44545.6	23901	59880	3528013668	3528013668		3	0.57	29388.3	16642	44788	16751.3	2680209244
						4	79200	46237	23901	60651	3661973538	3661973538		4	0.57	39775.7	16642	56283	22672.1	3627540966
						5	79200	49743.2	24415	65534	3939664042	3939664042		5	0.57	39737.2	16642	56321	22650.2	3624033501
						6	79200	44721.2	21074	63221	3541920422	3541920422		6	0.57	41708.5	16826	60065	23773.8	3803812015
						7	79200	47760.8	25700	62707	3782652730	3782652730		7	0.57	31976.7	16642	50211	18226.7	2916274882
						8	79200	46234.6	22359	62193	3661783623	3661783623		8	0.57	38479.2	17716	55531	21933.2	3509305264
						9	79200	43522.7	17990	59880	3446995047	3446995047		9	0.57	39565.5	16642	57979	22552.3	3608375410
						10	79200	24513.3	17476	40092	1941450217	1941450217		10	0.57	37677.6	16642	53641	21476.3	3436200864
						11	79200	30631.4	17733	48315	2426006754	2426006754		11	0.57	25138.3	16642	40592	14328.8	2292614160
						12	79200	30033.4	17476	49600	2378648593	2378648593		12	0.57	31195.6	16642	49935	17781.5	2845038667
						13	79200	28444.5	17476	45746	2252802890	2252802890		13	0.57	29840.6	16642	48178	17009.1	2721462848
						14	79200	25402.2	17476	41377	2011854082	2011854082		14	0.57	30916.5	16642	46854	17622.4	2819582798
						15	79200	25167.2	18504	39578	1993243170	1993243170		15	0.57	23846.2	16642	37894	13592.3	2174773618
						16	79200	29003.6	18761	46517	2297085789	2297085789		16	0.57	47950.7	17650	65535	27331.9	4373103907
						17	79200	26748.5	17476	41891	2118479784	2118479784		17	0.57	38333.3	16642	55441	21850	3495995591
						18	79200	27109.4	17476	44461	2147065123	2147065123		18	0.57	25555.2	16642	41210	14566.4	2330631418
						19	79200	23843.7	17733	35980	1888423921	1888423921		19	0.57	28589.4	16642	46632	16296	2607351976
														20	0.57	24554.8	16642	39144	13996.2	2239395330
							Bre5
							area	mean	min	max	int dens	raw int dens
						1	67200	50859.6	29298	64763	3417768272	3417768272
						2	67200	33215.6	21588	47802	2232089204	2232089204
						3	67200	49890.8	25443	61679	3352658848	3352658848
						4	67200	51076.7	30840	62193	3432353779	3432353779
						5	67200	51512.8	31868	64763	3461658428	3461658428
						6	67200	46961.1	24415	61679	3155789171	3155789171
						7	67200	47740	31868	59623	3208129765	3208129765
						8	67200	51128.1	27756	65534	3435810374	3435810374
						9	67200	43507.5	23130	57310	2923701902	2923701902
						10	67200	27261.1	19789	40349	1831946886	1831946886
						11	67200	37699	21331	55511	2533373261	2533373261
						12	67200	36707.1	22616	54226	2466719498	2466719498
						13	67200	34536	21331	50371	2320817425	2320817425
						14	67200	26972.7	19532	41120	1812563432	1812563432
						15	67200	28988.3	20303	43690	1948012455	1948012455
						16	67200	36239.5	22102	54226	2435292436	2435292436
						17	67200	31855.7	19532	49858	2140704630	2140704630
						18	67200	39741.1	20303	57053	2670602466	2670602466
						19	67200	26737.7	19789	39321	1796772324	1796772324

## Sheet: RNAbind_ex2
	BY	BY	BY	BY	BY	BY	Bre5	Bre5	Bre5	Bre5	Bre5	Bre5				Unbound Bre5/BY	Bound Bre5/BY		BY UB signal -BG	BY B signal -BG	Bre5 UB signal -BG	Bre5 B signal -BG
RNA	Unbound	Background	signal - background	Bound	Background	signal - background	Unbound	Background	signal - background	Bound	Background	signal - background			1	1.0123	-0.862593		all divided by Bre5 binding to RNA9
1	4749.21	1978.21	2771	2029.37	1978.21	51.162	4518.82	1713.74	2805.08	1669.61	1713.74	-44.132			2	0.900974	1.71615		1.76954	0.0326717	1.7913	-0.0281824
2	3441.73	1978.21	1463.52	2781.86	1978.21	803.653	3032.34	1713.74	1318.6	3092.94	1713.74	1379.19			3	0.911549	0.781503		0.934594	0.513207	0.842045	0.880742
3	5039.1	1978.21	3060.89	3497.2	1978.21	1518.99	4503.9	1713.74	2790.16	2900.84	1713.74	1187.1			4	0.939991	1.87884		1.95466	0.970016	1.78177	0.758071
4	4693.91	1978.21	2715.7	2660.1	1978.21	681.888	4266.48	1713.74	2552.73	2994.9	1713.74	1281.16			5	0.913894	-39.0653		1.73422	0.435449	1.63016	0.818138
5	4899.27	1978.21	2921.06	1977.34	1978.21	-0.873	4383.28	1713.74	2669.54	1747.85	1713.74	34.104			6	0.915701	0.441554		1.86536	-0.000557491	1.70474	0.0217786
6	4693.44	1978.21	2715.23	3258.43	1978.21	1280.22	4200.09	1713.74	2486.34	2279.03	1713.74	565.288			7	0.93818	3.54444		1.73393	0.817541	1.58776	0.360989
7	4749.16	1978.21	2770.95	2312.02	1978.21	333.81	4313.4	1713.74	2599.65	2896.91	1713.74	1183.17			8	0.849936	0.390509		1.76951	0.213169	1.66012	0.755563
8	4784.58	1978.21	2806.37	2611.71	1978.21	633.499	4098.98	1713.74	2385.24	1961.13	1713.74	247.387			9	0.949099	47.2852		1.79213	0.404548	1.52319	0.157979
9	4485.2	1978.21	2506.99	2011.33	1978.21	33.117	4093.13	1713.74	2379.38	3279.69	1713.74	1565.94							1.60095	0.0211483	1.51946	1
						BY	area	mean	min	max	int dens	raw int dens		Bre5	area	mean	min	max	int dens	raw int dens
						1	0.101	47066.1	22148	63137	4749.21	4902403675		1	0.091	49920.6	25520	62793	4518.82	4664583841
						2	0.101	34108.6	14294	48397	3441.73	3552749022		2	0.091	33499.1	12962	49655	3032.34	3130151497
						3	0.101	49939	26738	65535	5039.1	5201645856		3	0.091	49755.7	27326	64297	4503.9	4649176266
						4	0.101	46518	21588	63797	4693.91	4845314082		4	0.091	47132.9	15296	63351	4266.48	4404095175
						5	0.101	48553.2	24600	64495	4899.27	5057296688		5	0.091	48423.2	24696	65535	4383.28	4524665763
						6	0.101	46513.4	18982	62557	4693.44	4844833229		6	0.091	46399.4	16320	64173	4200.09	4335562886
						7	0.101	47065.6	22912	62833	4749.16	4902354072		7	0.091	47651.2	23940	65259	4313.4	4452530942
						8	0.101	47416.6	15430	65189	4784.58	4938913407		8	0.091	45282.5	17142	64665	4098.98	4231197770
						9	0.101	44449.7	14162	62045	4485.2	4629876724		9	0.091	45217.8	16716	64081	4093.13	4225155157
						10	0.101	20111.7	11106	35946	2029.37	2094831270		10	0.091	18444.6	10678	34810	1669.61	1723467292
						11	0.101	27569.1	11106	47643	2781.86	2871595008		11	0.091	34168.5	10678	53147	3092.94	3192703201
						12	0.101	34658.3	11106	54561	3497.2	3610006622		12	0.091	32046.3	10678	50915	2900.84	2994409223
						13	0.101	26362.3	11106	45139	2660.1	2745901841		13	0.091	33085.5	10678	54017	2994.9	3091506694
						14	0.101	19596	11106	37234	1977.34	2041118162		14	0.091	19308.9	10678	41328	1747.85	1804226934
						15	0.101	32292	11106	53957	3258.43	3363538259		15	0.091	25177.1	10678	45125	2279.03	2352544111
						16	0.101	22912.8	11106	46323	2312.02	2386596025		16	0.091	32003	10678	52851	2896.91	2990357004
						17	0.101	25882.8	11106	46563	2611.71	2695951776		17	0.091	21665.1	10678	48937	1961.13	2024389013
						18	0.101	19932.8	11106	38916	2011.33	2076204024		18	0.091	36231.6	12088	57051	3279.69	3385477266
						19	0.101	19604.6	11106	33964	1978.21	2042019278		19	0.091	18932.2	10678	33616	1713.74	1769022644

## Sheet: RNAbind_ex3
	BY	BY	BY	BY	BY	BY	Bre5	Bre5	Bre5	Bre5	Bre5	Bre5				Unbound Bre5/BY	Bound Bre5/BY		BY UB signal -BG	BY B signal -BG	Bre5 UB signal -BG	Bre5 B signal -BG
RNA	Unbound	Background	signal - background	Bound	Background	signal - background	Unbound	Background	signal - background	Bound	Background	signal - background			1	1.13011	0.768422		all divided by Bre5 binding to RNA9
1	4981.5	1430.04	3551.46	1225.9	1112.85	113.059	5708.34	1694.81	4013.53	980.016	893.139	86.877			2	0.819241	1.31339		1.71685	0.0546549	1.94022	0.041998
2	2704.58	1112.85	1591.74	2335.84	1112.85	1222.99	2197.15	893.139	1304.01	2499.41	893.139	1606.27			3	0.858801	2.94977		0.769476	0.591217	0.630386	0.776501
3	4221.24	1112.85	3108.39	1683.84	1112.85	570.99	3562.63	893.139	2669.49	2577.43	893.139	1684.29			4	0.854583	2.59937		1.50266	0.276028	1.29048	0.814219
4	4111.56	1112.85	2998.71	1752.56	1112.85	639.715	3455.79	893.139	2562.65	2555.99	893.139	1662.86			5	0.91293	5.60756		1.44963	0.309251	1.23883	0.803857
5	4191.5	1112.85	3078.66	1147.04	1112.85	34.189	3703.73	893.139	2810.59	1084.86	893.139	191.717			6	0.869774	8.33179		1.48828	0.0165276	1.3587	0.0926797
6	4045.02	1112.85	2932.17	1184.1	1112.85	71.256	3443.47	893.139	2550.33	1486.83	893.139	593.69			7	0.985048	3.091		1.41747	0.0344465	1.23288	0.287001
7	3966.54	1112.85	2853.69	1617.67	1112.85	504.827	3704.16	893.139	2811.03	2453.56	893.139	1560.42			8	0.903401	19.0383		1.37953	0.244043	1.3589	0.754337
8	4199.54	1112.85	3086.7	1157.67	1112.85	44.827	3681.66	893.139	2788.52	1746.57	893.139	853.428			9	0.888255	6.29823		1.49217	0.0216702	1.34803	0.412563
9	3830.07	1112.85	2717.22	1441.29	1112.85	328.441	3306.72	893.139	2413.59	2961.74	893.139	2068.6							1.31356	0.158775	1.16677	1
					BY	area	mean	min	max	int dens	raw int dens		Bre5	area	mean	min	max	int dens	raw int dens
					1	0.11	45265.7	16960	63541	4981.5	5142183552		1	0.128	44542.7	14016	62817	5708.34	5892470801
					2	0.11	12994.4	9316	30798	1430.04	1476162940		2	0.128	13224.8	9414	32186	1694.81	1749477154
					3	0.083	32420.8	10548	48095	2704.58	2791820798		3	0.071	31113.2	9414	46935	2197.15	2268025504
					4	0.083	50601.5	24890	65535	4221.24	4357396265		4	0.071	50449.2	25374	63895	3562.63	3677541597
					5	0.083	49286.8	16402	63313	4111.56	4244180598		5	0.071	48936.2	17926	62723	3455.79	3567255687
					6	0.083	50245.1	23932	64019	4191.5	4326702533		6	0.071	52447.3	29988	64471	3703.73	3823201770
					7	0.083	48489.1	16876	62859	4045.02	4175496026		7	0.071	48761.8	16088	63387	3443.47	3554541780
					8	0.083	47548.4	22664	63057	3966.54	4094484513		8	0.071	52453.4	30424	60941	3704.16	3823645870
					9	0.083	50341.5	18728	65019	4199.54	4335003119		9	0.071	52134.8	20624	65535	3681.66	3800418264
					10	0.083	45912.4	9316	62585	3830.07	3953609148		10	0.071	46825.4	16948	61091	3306.72	3413385936
					11	0.083	14695.4	9316	32410	1225.9	1265448202		11	0.071	13877.7	9414	31440	980.016	1011627062
					12	0.083	28000.5	9316	47655	2335.84	2411181654		12	0.071	35393.3	9414	52963	2499.41	2580027585
					13	0.083	20184.8	9316	39826	1683.84	1738150210		13	0.071	36498.1	10726	53287	2577.43	2660568384
					14	0.083	21008.6	9316	41606	1752.56	1809091366		14	0.071	36194.6	9414	53061	2555.99	2638441120
					15	0.083	13749.9	9316	31738	1147.04	1184033944		15	0.071	15362.3	9414	38018	1084.86	1119849552
					16	0.083	14194.3	9316	32770	1184.1	1222296772		16	0.071	21054.5	9414	41896	1486.83	1534787780
					17	0.083	19391.6	9316	41772	1617.67	1669852578		17	0.071	34744	9414	53183	2453.56	2532701965
					18	0.083	13877.5	9316	33286	1157.67	1195015022		18	0.071	24732.6	9414	49593	1746.57	1802904204
					19	0.083	17277.2	9316	38198	1441.29	1487777214		19	0.071	41940.2	10076	60109	2961.74	3057270536
					20	0.083	13340.1	9316	31254	1112.85	1148742118		20	0.071	12647.5	9414	29500	893.139	921948558

## Sheet: Combined
	Unbound Bre5/BY	Bound Bre5/BY	Unbound Bre5/BY	Bound Bre5/BY	Unbound Bre5/BY	Bound Bre5/BY	Unbound mean	unbound stdev	Bound mean	Bound stdev		Ex1	Ex2	Ex3				Untagged	BY SD	Bre5	Bre5 SD	BY SE	Bre5 SE
1	0.908908	0.663342	1.0123	-0.862593	1.13011	0.768422	1.13011	0.110678	0.189723	0.912846		BY B signal -BG	BY B signal -BG	BY B signal -BG	Bre5 B signal -BG	Bre5 B signal -BG	Bre5 B signal -BG							Nab3 UB signal -BG	Nab3
2	0.778024	1.37021	0.900974	1.71615	0.819241	1.31339	0.819241	0.062578	1.46659	0.217992
3	0.948949	1.36661	0.911549	0.781503	0.858801	2.94977	0.858801	0.0452913	1.6993	1.12177	1	0.0606826	0.0326717	0.0546549	0.0402533	-0.0281824	0.041998	0.0493364	0.0147434	0.018023	0.0400245	0.00851211	0.0231082	1.04503	0.024942
4	0.922208	1.43819	0.939991	1.87884	0.854583	2.59937	0.854583	0.0450631	1.97213	0.586186	2	0.615203	0.513207	0.591217	0.842957	0.880742	0.776501	0.573209	0.0533294	0.8334	0.0527737	0.0307898	0.0304689	0.206595	0.283845
5	0.811649	0.127936	0.913894	-39.0653	0.91293	5.60756	0.91293	0.0587549	-11.1099	24.3646	3	0.561007	0.970016	0.276028	0.766679	0.758071	0.814219	0.60235	0.348837	0.779656	0.0302402	0.201401	0.0174592	0.650579	0.225929
6	0.821905	1.44287	0.915701	0.441554	0.869774	8.33179	0.869774	0.0469015	3.4054	4.29565	4	0.416991	0.435449	0.309251	0.59971	0.818138	0.803857	0.38723	0.0681598	0.740568	0.122195	0.0393521	0.0705496	0.271915	0.271915
7	0.745083	1.56247	0.93818	3.54444	0.985048	3.091	0.985048	0.127192	2.73264	1.03845	5	0.141252	-0.000557491	0.0165276	0.0180711	0.0217786	0.0926797	0.0524073	0.0774144	0.0441765	0.0420459	0.0446952	0.0242752	0.733191	-0.0302861
8	0.924256	1.49499	0.849936	0.390509	0.903401	19.0383	0.903401	0.0383336	6.97459	10.462	6	0.119954	0.817541	0.0344465	0.173077	0.360989	0.287001	0.323981	0.429569	0.273689	0.0946603	0.248012	0.0546522	0.317231	1
9	0.723053	3.37854	0.949099	47.2852	0.888255	6.29823	0.888255	0.116969	18.9873	24.5501	7	0.467667	0.213169	0.244043	0.730714	0.755563	0.754337	0.308293	0.138883	0.746872	0.0140062	0.0801841	0.00808649	0.595166	0.588928
											8	0.263273	0.404548	0.0216702	0.393592	0.157979	0.412563	0.22983	0.193617	0.321378	0.141825	0.111785	0.0818827	0.641597	0.0427594
											9	0.295986	0.0211483	0.158775	1	1	1	0.158636	0.137419	1	0	0.0793388	0	0.560904	0.172449
