# Supplementary material for: RNA polymerase II stalling at pre-mRNA splice sites is enforced by ubiquitination of the catalytic subunit
Source: eLife. 2017 Oct 13;6:e27082. doi: 10.7554/eLife.27082 (PMC5673307; doi:10.7554/eLife.27082)
Supplement: Figure 2—figure supplement 1—source data 1. [file elife-27082-fig2-figsupp1-data1.xlsx]

## Sheet: Sheet1
5'SS	Promoter	5'SS	3'SS	E2-1	E2-2			5'SS/Dbre5	Promoter	5'SS	3'SS	E2-1	E2-2
0	4.26733	1.51572	4.1315	4.76783	3.36359			0	1	1	1	1	1
5	1.71713	1.39474	7.42985	9.66878	5.08648			5	0.40239	0.920188	1.79834	2.02792	1.51222
6	7.69186	26.6611	21.506	24.7039	12.6845			6	1.8025	17.5898	5.20537	5.18137	3.77114
7	1.46409	9.18959	19.8812	15.3128	4.90754			7	0.343092	6.06287	4.8121	3.21169	1.45902
7.5		5.72258	21.506	5.74909	8.89709			7.5		3.7755	5.20537	1.20581	2.64512
8	25.0487	31.7056	23.1563	25.5751	30.6256			8	5.86989	20.9179	5.60481	5.36409	9.10505
8.5	6.82108	8.71399	25.6935	19.1597	20.3459			8.5	1.59844	5.74909	6.21893	4.01853	6.04887
9	8.14925	10.5805	25.3984	19.3823	16.8733			9	1.90968	6.98051	6.1475	4.06522	5.01645
10	8.41716	7.55099	10.8028	12.2666	10.9536			10	1.97247	4.9818	2.61474	2.57279	3.25653
10.5	7.88986	8.57419	10.4831	7.2434	11.2356			10.5	1.8489	5.65685	2.53737	1.51922	3.34035
11	75.4091	92.1982	56.8859	42.0296	46.6347			11
12	79.3413	54.9482	38.0546	23.9176	34.3761			12
5'SS	Promoter
0	4.26733
5	1.71713
6	7.69186
7	1.46409
8	25.0487
8.5	6.82108
9	8.14925
10	8.41716
10.5	7.88986
11	75.4091
12	79.3413
