# Supplementary material for: RNA polymerase II stalling at pre-mRNA splice sites is enforced by ubiquitination of the catalytic subunit
Source: eLife. 2017 Oct 13;6:e27082. doi: 10.7554/eLife.27082 (PMC5673307; doi:10.7554/eLife.27082)
Supplement: Figure 2—figure supplement 1—source data 3. [file elife-27082-fig2-figsupp1-data3.xlsx]

## Sheet: 27_01_14primerA - Text Report
Ribo5'SS	Promoter	3'SS	E2-1	Promoter SD	3'SS SD	E2-1 SD		Ribo5'SS/Dbre5	Promoter	3'SS	E2-1	Promoter SD	3'SS SD	E2-1 SD
0	0.641292	1.17266	0.418255	0.128501	0.297041	0.0301167		0	0.718325	0.915313	0.374514	0.239389	0.213699	0.0423006
5	2.19971	5.18613	2.04907	0.540468	1.5243	0.263899		5	2.77032	2.8925	1.58794	0.621217	0.317777	0.508902
6	2.21719	6.36542	2.17745	0.451429	1.1585	0.451062		6	2.14343	4.3216	1.48267	0.354224	0.649529	0.150839
7	2.39744	2.0199	2.31919	0.68831	0.746122	0.502615		7	2.37572	4.39523	2.55202	0.559441	1.35307	0.486338
7.5	2.15988	3.74611	1.70144	1.13103	1.76128	0.252027		7.5	1.62513	3.15049	1.31084	0.49456	0.565484	0.0423473
8	2.35593	5.76531	1.97916	0.563203	1.92193	1.70256		8	3.12504	4.0011	1.73582	0.284546	2.00432	0.346136
8.5	2.57722	3.23281	1.40359	0.764663	1.04087	0.101066		8.5	2.38088	5.09141	2.16552	0.131168	0.871039	0.218073
9	1.19724	2.8337	1.47338	0.288708	0.318813	0.349257		9	2.87147	4.04337	2.50379	0.839091	0.747271	0.638299
10	1.84546	3.3407	1.92662	0.272516	1.83349	0.663831		10	4.29932	3.0956	1.8688	0.892416	0.849063	0.247299
10.5	2.87408	3.88411	2.2934	1.35092	0.481591	0.492596		10.5	3.49235	2.71105	2.54239	0.865413	0.791733	0.569257
11	2.01844	2.81323	2.00576	0.340951	0.933214	0.553218		11	1.44536	2.34164	1.08896	0.428257	0.664196	0.336377
12	3.29946	4.55304	2.25865	0.675166	1.4314	0.392084		12	2.40345	3.74265	1.92172	0.674947	1.06471	0.137331
				Promoter SE	3'SS SE	E2-1 SE						Promoter SE	3'SS SE	E2-1 SE
				0.0741903	0.171497	0.0173879						0.138211	0.123379	0.0244223
				0.312039	0.880054	0.152362						0.35866	0.183469	0.293815
				0.260633	0.668859	0.260421						0.204511	0.375006	0.0870867
				0.397396	0.430774	0.290185						0.322994	0.781196	0.280788
				0.653	1.01687	0.145508						0.285534	0.326482	0.0244492
				0.325165	1.10963	0.982974						0.164283	1.15719	0.199842
				0.441478	0.600947	0.0583508						0.0757297	0.502895	0.125905
				0.166686	0.184067	0.201643						0.48445	0.431437	0.368522
				0.157337	1.05856	0.383263						0.515237	0.490207	0.142778
				0.779952	0.278047	0.2844						0.499646	0.457107	0.328661
				0.196848	0.538792	0.319401						0.247254	0.383474	0.194208
				0.389808	0.826417	0.22637						0.389681	0.61471	0.0792878
