# Supplementary material for: RNA polymerase II stalling at pre-mRNA splice sites is enforced by ubiquitination of the catalytic subunit
Source: eLife. 2017 Oct 13;6:e27082. doi: 10.7554/eLife.27082 (PMC5673307; doi:10.7554/eLife.27082)
Supplement: Figure 2—figure supplement 1—source data 4. [file elife-27082-fig2-figsupp1-data4.xlsx]

## Sheet: Sheet1
5'SS	pre-mRNA	mRNA	e2-1	E2-1 from 15_10_13		5'SS/Dbre5	pre-mRNA	mRNA	E2-1
0	0.09458	8.395e-05	0.03332			0	0.129067	0.000215757	0.01225
5	0.769933	0.000949233	0.0515233			5	5.24333	0.006537	0.121733
6	0.879133	0.00105363	0.0353767			6	8.67667	0.0120767	0.155333
7	5.55667	0.00735533	0.1523			7	6.12	0.00827133	0.1303
7.5	0.3191	0.0002351	0.0245967			7.5	0.364733	0.0002508	0.0551633
8	0.325767	0.0002139	0.0342433			8	0.219733	0.000184467	0.0285167
8.5	1.00197	0.00116677	0.0544			8.5	0.326133	0.0002075	0.010235
9	1.34667	0.00143233	0.0552833			9	0.359433	0.000264333	0.0221233
10	6.16333	0.00963233	0.128167			10	0.3894	0.000287	0.0215733
10.5	0.249467	0.000209067	0.01858			10.5	0.604867	0.000538433	0.02914
11	0.699933	0.000666633	0.0437633			11	0.357333	0.000334533	0.0408367
12	0.4808	0.000416267	0.0324367			12	0.266633	0.0001796	0.0238933
