# Supplementary material for: RNA polymerase II stalling at pre-mRNA splice sites is enforced by ubiquitination of the catalytic subunit
Source: eLife. 2017 Oct 13;6:e27082. doi: 10.7554/eLife.27082 (PMC5673307; doi:10.7554/eLife.27082)
Supplement: Figure 2—figure supplement 1—source data 5. [file elife-27082-fig2-figsupp1-data5.xlsx]

## Sheet: Sheet1
time	5'SS/Alg9	STDEV/Alg9	mRNA/Alg9	STDEV/Alg9	E2-1/Alg9	STDEV/Alg9	5'SS Ex3
0	5.60042	0.61913	0.266351	0.0871558	6.1345	0.209433
5	8.75482	0.771646	0.30838	0.0839199	10.0771	0.324198
6	17.7114	3.60868	0.368846	0.124985	12.1557	0.203391
7	12.9886	1.80943	0.585597	0.0278902	12.9898	1.14446
7.5	15.6803	1.22007	0.594982	0.0478012	13.3709	0.330107
8	7.52651	1.08118	0.302602	0.140097	15.5827	1.96055
8.5	15.9089	0.620697	0.605139	0.0876619	15.882	0.423915
9	14.8232	1.85724	0.66054	0.0452352	15.3364	0.642016
10	11.3045	0.989505	0.472513	0.026066	12.748	1.145
10.5	17.3357	0.160757	0.773676	0.0594083	15.9172	0.497682
11	16.9923	1.34777	1.05751	0.239195	16.7321	0.984964
12	13.5824	1.01763	0.738199	0.0356618	16.9147	0.362064
5'SS Dbre5 Ex3
time	5'SS/Alg9	STDEV/Alg9	mRNA/Alg9	STDEV/Alg9	E2-1/Alg9	STDEV/Alg9
0	7.71525	1.15695	0.245928	0.0259765	7.05733	0.501857
5	9.77927	1.37595	0.177775	0.0219316	8.39509	0.40626
6	15.0173	0.71169	0.222562	0.006393	10.0861	0.463553
7	13.5798	2.22387	0.203864	0.0554255	9.68309	0.573791
7.5	24.2836	1.19778	0.350434	0.0270488	11.135	0.714084
8	17.4341	2.8262	0.253526	0.017878	11.6628	0.991645
8.5	17.3908	1.72134	0.208764	0.0433583	12.4332	0.547499
9	15.7199	1.07633	0.177176	0.0481763	11.626	0.280806
10	22.677	0.706632	0.392214	0.0344647	12.9255	0.546835
10.5	23.9095	0.677013	0.490603	0.0134991	13.742	1.92766
11	42.0659	2.97935	0.701244	0.0385069	16.5885	0.621826
12	22.2904	3.42168	0.344414	0.0414815	13.4261	0.387596
5'SS Ex2
time	5'SS/Alg9	STDEV/Alg9	mRNA/Alg9	STDEV/Alg9	E2-1/Alg9	STDEV/Alg9
0	4.23925	0.671365	0.0232473	0.0240935	4.23751	0.208304
5	13.8355	1.56811	0.0702897	0.0187825	10.057	0.931765
6	10.6714	1.09012	0.116604	0.00472422	9.68727	0.636472
7	17.2673	2.31448	0.183266	0.0192744	12.8708	0.462075
7.5	17.8395	0.772281	0.110487	0.0502733	16.6167	1.11928
8	13.5664	0.735357	0.0560395	0.00973667	11.7925	0.525033
8.5	19.6543	5.60344	0.211951	0.0416641	13.8582	0.486933
9	15.6058	1.24613	0.125118	0.0345495	14.1374	1.12823
10	14.1865	1.00753	0.128931	0.0387647	12.7058	0.943408
10.5	17.9535	2.71681	0.193146	0.0104155	17.5375	0.944496
11	22.5255	1.8727	0.206323	0.0546383	18.5277	1.15874
12	16.1507	1.8714	0.1545	0.0466049	15.5965	1.4134
5'SS/Dbre5 Ex2
time	5'SS/Alg9	STDEV/Alg9	mRNA/Alg9	STDEV/Alg9	E2-1/Alg9	STDEV/Alg9
0	8.72992	0.261416	0.0954219	0.0226232	7.47033	0.26944
5	11.8536	1.08957	0.269583	0.0356559	10.9219	0.482014
6	13.1952	0.482301	0.166757	0.0733377	11.9082	0.437742
7	16.2003	0.696362	0.334126	0.0358774	12.0998	0.406349
7.5	11.5403	1.18458	0.0970159	0.0559533	11.7696	0.582281
8	14.0604	0.804739	0.287531	0.0258262	12.3955	0.160173
8.5	19.4084	3.15143	0.443177	0.0118764	13.7387	0.411198
9	13.6572	1.49659	0.258742	0.026021	12.8385	0.252672
10	18.3333	1.10463	0.355908	0.113384	13.7526	1.15356
10.5	17.5818	0.453122	0.465053	0.057797	16.0045	0.812257
11	20.6175	0.879425	0.503541	0.042544	15.0073	0.22286
12	16.5261	0.630516	0.337526	0.13792	16.3142	1.0699
