# Supplementary material for: RNA polymerase II stalling at pre-mRNA splice sites is enforced by ubiquitination of the catalytic subunit
Source: eLife. 2017 Oct 13;6:e27082. doi: 10.7554/eLife.27082 (PMC5673307; doi:10.7554/eLife.27082)
Supplement: Figure 2—source data 2. [file elife-27082-fig2-data2.xls]

## Sheet: COMPARED RNA DATA 
UBR2 DELTA		COPIES PER CELL										RNA ACCUMULATION
		mRNA	premRNA		mRNA	premRNA			splicing efficiency	S/US				mRNA	premRNA
	0	1.44194	1.7674		0.238415	0.197471		0	0.449296	0.815856			0	0	0		0	0
	2.5	3.65694	3.38105		0.895354	0.460412		2.5	0.5196	1.0816			2.5	2.215	1.61366		0.65897	0.269417
	5	3.5	3.35452		0.276188	0.500336		5	0.510612	1.04337			5	2.05806	1.58713		0.259373	0.523935
	6	6.68198	4.18229		1.12879	0.167056		6	0.615042	1.59768			6	5.24003	2.41489		1.05084	0.118974
	7	5.52492	8.46853		0.105264	1.10741		7	0.394822	0.652406			7	4.08298	6.70113		0.342107	0.964776
	8	8.34298	1.01546		1.53768	0.106437		8	0.891492	8.21593			8	6.90104	1		1.76314	0.114157
	9	8.00517	2.12134		1.62859	0.277079		9	0.790516	3.77364			9	6.56323	0.353946		1.49163	0.45912
	10	12.3064	6.36744		1.99493	2.78304		10	0.659018	1.93271			10	10.8644	4.60004		2.22871	2.90185
	11	10.5601	0.992399		1.89594	0.990416		11	0.914096	10.6409			11	9.11811	1		1.65752	0.87918
	12	18.428	3.5845		6.32	0.605696		12	0.837161	5.14102			12	16.9785	1.8171		6.15911	0.426926
	13	20.9878	4.83554		3.54225	1.65547		14	0.812746	4.34033			13	19.5459	3.06814		3.77313	1.6627
	15	27.5068	5.02022		5.20632	0.905788		15	0.84566	5.4792			15	26.0648	3.25282		5.38016	0.711021
BRE5 DELTA												RNA ACCUMULATION
				sT ERRORS
	mRNA	premRNA		mRNA	premRNA			splicing efficiency	S/US				mRNA	premRNA		mRNA	premRNA
0	3.7888	1.02578		0.287949	0.180841		0	0.226947	3.40632			0	0	0		0	0
2.5	3.86176	1.11758		0.877414	0.190664		2.5	0.224443	3.45548			2.5	0.36764	0.091801		1.1295	0.162039
5	4.58138	4.46342		0.640445	0.283818		5	0.493479	1.02643			5	1.08725	3.43765		0.891676	0.263099
6	8.26857	2.86617		1.57595	0.945455		6	0.257408	2.88488			6	4.77445	1.8404		1.3847	0.766239
7	9.03974	3.9227		1.95521	0.583872		7	0.302621	2.30446			7	5.54561	2.89693		1.89724	0.764562
8	8.49376	5.77226		2.07158	0.413434		8	0.404616	1.47148			8	4.99964	4.74648		1.88991	0.232597
9	10.1245	10.7996		1.50494	1.56223		9	0.516131	0.937492			9	6.63042	9.77382		1.68265	1.50149
10	11.234	11.4227		0.38841	2.10529		10	0.504163	0.983484			10	9.59885	10.3969		0.688473	2.25244
11	13.4335	9.40424		0.532523	1.90591		11	0.411785	1.42845			11	9.93941	8.37847		0.812044	1.72538
12	14.9005	6.35441		1.73868	0.407943		12	0.298961	2.34491			12	11.4064	5.32863		1.45497	0.528003
14	11.786	6.53417		1.01737	1.36289		14	0.356665	1.80375			14	8.29192	5.5084		0.741626	1.21007
WT - RIBO1
				sT ERRORS								RNA ACCUMULATION
	mRNA	premRNA		mRNA	premRNA			splicing efficiency	S/US				mRNA	premRNA
0	2.45678	3.11157		0.153638	0.069951		0	0.441205	0.789564			0	0	0		0.141256	0.064682
2.5	2.66667	3.23457		0.544351	0.166601		2.5	0.451883	0.824428			2.5	0.209887	0.122999		0.500478	0.154052
5	3.25789	7.34689		1.18582	0.631958		5	0.30721	0.443438			5	0.80111	4.23532		1.09024	0.584356
6	6.45678	5.345		1.54518	0.648522		6	0.547102	1.208			6	4	2.23343		1.42064	0.599672
7	8.5677	3.24789		0.993387	0.233804		7	0.725118	2.63793			7	6.11092	0.136323		0.913323	0.216193
8	11.345	5.78992		2.62367	0.828599		8	0.662098	1.95944			8	8.88822	2.67836		2.41221	0.766185
9	11.1544	7.49001		1.73417	1.06531		9	0.598271	1.48924			9	8.69766	4.37845		1.59441	0.98507
10	14.56	4.67899		1.13868	0.711046		10	0.756796	3.11178			10	12.1032	1.56742		1.0469	0.657487
11	18.789	4.56789		2.98141	0.814201		11	0.804431	4.11328			11	16.3322	1.45632		2.74112	0.752871
12	20.8079	5.6787		0.881475	0.854049		12	0.785601	3.66421			12	18.3511	2.56713		0.810431	0.789718
13	21.9	5.659		0.873784	0.597931		13	0.794659	3.86994			13	19.4432	2.54743		0.803359	0.552892
14	22.222	6.8999		3.88164	1.68742		14	0.763068	3.22063			14	19.7652	3.78833		3.56879	1.56031
15	24.6788	5.80707		1.90777	0.621177		15	0.809516	4.24979			15	22.222	2.6955		1.75401	0.574387

## Sheet: WT RIBO1
	%input relative to T0							ST ERROR
	PROMOTER	5'SS	3'SS	E2-1	E2-2			PROMOTER	5'SS	3'SS	E2-1	E2-2
0	1	1	1	1	1			0	0	0	0	0
2	0.412601	0.677888	3.76986	2.7809	2.44507			0.0480057	0.054791	0.401794	0.730736	0.383384
4	0.938453	0.553713	1.41992	4.72093	1.01981			0.117975	0.0291085	0.964898	0.864019	0.207709
5	2.37044	1.08859	13.9913	9.59576	8.88684			0.41106	0.0885855	3.65789	1.90462	0.68397
6	4.51889	0.866931	2.52611	2.45152	7.896			0.617254	0.0971382	0.479659	1.46946	0.233993
7	7.24479	1.77709	2.22998	5.4265	6.45567			0.950458	0.168305	0.755488	1.01888	0.166716
8	3.94637	0.95233	10.9626	10.803	9.86741			0.681837	0.100749	3.96712	0.750306	6.41648
9	7.17823	0.755966	3.44175	6.45765	15.3994			1.42902	0.0348342	1.122	1.28154	6.41352
10	9.48798	0.701911	3.13617	4.51561	7.04576			1.47185	0.101537	0.487318	0.148527	1.98609
11	5.5132	0.202373	9.55275	5.32144	10.4021			1.73829	0.051647	3.47446	0.962672	7.45008
12	3.27167	1.72009	0.809744	11.4565	9.3456			0.527636	0.287122	0.378365	1.04573	1.32996
13	7.20615	2.02484	1.08122	5.73207	13.2981			1.15824	0.195325	0.645877	0.445908	6.89094
14	7.62462	2.10162	3.17582	5.59245	3.28047			1.13854	0.298964	1.11886	1.24079	0.322326
15	3.32646	0.755966	0.957341	4.26771	4.88375			0.683781	0.0348342	0.662093	0.643376	3.2334
	1
0	1	0
2	0.412601	0.0480057
4	0.938453	0.117975
5	2.37044	0.41106
6	4.51889	0.617254
7	7.24479	0.950458
8	3.94637	0.681837
9	7.17823	1.42902
10	9.48798	1.47185
11	5.5132	1.73829
12	3.27167	0.527636
13	7.20615	1.15824
14	7.62462	1.13854
15	3.32646	0.683781
	2
0	1	0
2	0.677888	0.054791
4	0.553713	0.0291085
5	1.08859	0.0885855
6	0.866931	0.0971382
7	1.77709	0.168305
8	0.95233	0.100749
9	0.755966	0.0348342
10	0.701911	0.101537
11	0.202373	0.051647
12	1.72009	0.287122
13	2.02484	0.195325
14	2.10162	0.298964
15	0.755966	0.0348342
	3
0	1	0
2	3.76986	0.401794
4	1.41992	0.964898
5	13.9913	3.65789
6	2.52611	0.479659
7	2.22998	0.755488
8	10.9626	3.96712
9	3.44175	1.122
10	3.13617	0.487318
11	9.55275	3.47446
12	0.809744	0.378365
13	1.08122	0.645877
14	3.17582	1.11886
15	0.957341	0.662093
	4
0	1	0
2	2.7809	0.730736
4	4.72093	0.864019
5	9.59576	1.90462
6	2.45152	1.46946
7	5.4265	1.01888
8	10.803	0.750306
9	6.45765	1.28154
10	4.51561	0.148527
11	5.32144	0.962672
12	11.4565	1.04573
13	5.73207	0.445908
14	5.59245	1.24079
15	4.26771	0.643376
	5
0	1	0
2	2.44507	0.383384
4	1.01981	0.207709
5	8.88684	0.68397
6	7.896	0.233993
7	6.45567	0.166716
8	9.86741	2.123
9	15.3994	4.56
10	7.04576	1.98609
11	10.4021	3.2334
12	9.3456	1.32996
13	13.2981	2.9998
14	3.28047	0.322326
15	4.88375	3.2334

## Sheet:  BRE5 delta
	%input relative to T0							ST ERROR
	PROMOTER	5'SS	3'SS	E2-1	E2-2			PROMOTER	5'SS	3'SS	E2-1	E2-2
0	1	1	1	1	1			0	0	0	0	0
5	1.35684	2.61995	2.00188	1.90159	1.47639			0.356843	0.315468	0.366563	0.293294	0.0552607
6	2.07899	3.34023	4.48204	2.42455	1.06139			0.0874848	0.27966	0.397994	0.577787	0.0866807
7	2.84787	6.41185	4.63084	3.80608	4.53566			0.769627	0.934131	0.415061	0.752908	0.443739
7.5	3.07272	7.49571	4.81018	3.1264	2.2341			1.0506	0.799164	0.464127	0.931593	0.526582
8	5.29484	6.08855	4.98525	2.55641	2.17488			1.26654	1.18044	0.277754	0.460262	0.665873
8.5	5.85355	4.14033	2.62279	3.16176	2.08526			0.372982	0.340856	0.986546	0.906787	0.362323
9	5.61696	6.21614	6.9645	4.69961	2.79502			1.25616	0.864566	1.96722	1.49206	0.574864
10	6.53068	7.06623	8.971	8.98039	3.75161			2.16617	3.41951	0.703709	2.23805	0.0907864
10.5	5.51476	9.06821	5.20423	7.07217	5.50184			1.33902	1.62301	0.337075	1.53273	0.443312
11	3.86904	3.81635	5.25767	1.40171	1.09286			0.522117	0.70881	0.600343	0.308119	0.0998246
12	5.51476	5.97663	6.90627	4.16996	3.37957			1.33902	0.64007	1.04926	0.28774	1.00734
13	5.61696	8.89102	5.96874	3.41758	2.45273			1.25616	0.826394	0.435303	0.783822	1.26818
14	4.45532	4.97286	5.36424	3.94304	2.66925			0.171432	0.741715	0.754908	0.965028	0.75066
		1
	0	1	0
	5	1.35684	0.356843
	6	2.07899	0.0874848
	7	2.84787	0.769627
	7.5	3.07272	1.0506
	8	5.29484	1.26654
	8.5	5.85355	0.372982
	9	5.61696	1.25616
	10	6.53068	2.16617
	10.5	5.51476	1.33902
	11	3.86904	0.522117
	12	5.51476	1.33902
	13	5.61696	1.25616
	14	4.45532	0.171432
		2
	0	1	0
	5	2.61995	0.315468
	6	3.34023	0.27966
	7	6.41185	0.934131
	7.5	7.49571	0.799164
	8	6.08855	1.18044
	8.5	4.14033	0.340856
	9	6.21614	0.864566
	10	7.06623	3.41951
	10.5	9.06821	1.62301
	11	3.81635	0.70881
	12	5.97663	0.64007
	13	8.89102	0.826394
	14	4.97286	0.741715
		3	st error
	0	1	0
	5	2.00188	0.366563
	6	4.48204	0.397994
	7	4.63084	0.415061
	7.5	4.81018	0.464127
	8	4.98525	0.277754
	8.5	2.62279	0.986546
	9	6.9645	1.96722
	10	8.971	0.703709
	10.5	5.20423	0.337075
	11	5.25767	0.600343
	12	6.90627	1.04926
	13	5.96874	0.435303
	14	5.36424	0.754908
		4	st error
	0	1	0
	5	1.90159	0.293294
	6	2.42455	0.577787
	7	3.80608	0.752908
	7.5	3.1264	0.931593
	8	2.55641	0.460262
	8.5	3.16176	0.906787
	9	4.69961	1.49206
	10	8.98039	2.23805
	10.5	7.07217	1.53273
	11	1.40171	0.308119
	12	4.16996	0.28774
	13	3.41758	0.783822
	14	3.94304	0.965028
		5
	0	1	0
	5	1.47639	0.0552607
	6	1.06139	0.0866807
	7	4.53566	0.443739
	7.5	2.2341	0.526582
	8	2.17488	0.665873
	8.5	2.08526	0.362323
	9	2.79502	0.574864
	10	3.75161	0.0907864
	10.5	5.50184	0.443312
	11	1.09286	0.0998246
	12	3.37957	1.00734
	13	2.45273	1.26818
	14	2.66925	0.75066

## Sheet: UBR2 DELTA 
	%input relative to T0							ST ERROR
	PROMOTER	5'SS	3'SS	E2-1	E2-2			PROMOTER	5'SS	3'SS	E2-1	E2-2
0	1	1	1	1	1			0	0	0	0	0
2.5	6.13824	1.00901	3.83835	3.96639	13.5473			0.468371	0.0937613	0.371743	0.603917	3.00156
4	11.4971	1.07224	3.83026	5.07976	6.23024			2.00169	0.0745688	0.768903	1.57314	0.461005
5	6.24048	0.612747	2.33291	3.84112	4.92728			0.840668	0.0290948	0.0906715	0.512639	0.334797
6	10.5221	0.709607	3.01832	5.54528	3.80205			1.82553	0.0631329	0.285729	0.856398	1.18129
7	14.0937	1.15574	14.6812	12.9024	12.7019			1.51397	0.0905364	1.72469	1.5503	3.03924
8	8.24971	1.4746	4.91922	3.60013	6.37865			0.895869	0.154345	0.296718	0.110627	0.573959
9	11.2541	1.34685	5.45239	6.50316	17.0544			1.28526	0.163945	0.27334	1.25244	3.6883
10	10.2245	1.12177	8.55193	10.8292	6.73377			2.16461	0.0466629	2.75273	2.6351	0.657494
11	8.31575	1.10387	5.12631	6.7222	7.87502			0.752756	0.111542	0.283492	1.52007	1.55884
12	7.67922	1.30855	3.98628	1.33333	10.7378			0.861231	0.0392228	0.391392	0.333333	1.1513
13	6.41257	0.363909	14.6812	7.01905	1.72582			0.918731	0.0549246	1.72469	1.28045	0.368784
14	12.135	1.45232	5.31738	8.79969	9.39364			1.75473	0.0846068	0.278449	1.25782	1.40335
15	9.47136	1.16877	4.78921	2.19726	5.60964			1.3547	0.0882277	0.223829	0.288976	0.442933
	1
0	1	0
2.5	6.13824	0.468371
4	11.4971	2.00169
5	6.24048	0.840668
6	10.5221	1.82553
7	14.0937	1.51397
8	8.24971	0.895869
9	11.2541	1.28526
10	10.2245	2.16461
11	8.31575	0.752756
12	7.67922	0.861231
13	6.41257	0.918731
14	12.135	1.75473
15	9.47136	1.3547
	2
0	1	0
2.5	1.00901	0.0937613
4	1.07224	0.0745688
5	0.612747	0.0290948
6	0.709607	0.0631329
7	1.15574	0.0905364
8	1.4746	0.154345
9	1.34685	0.163945
10	1.12177	0.0466629
11	1.10387	0.111542
12	1.30855	0.0392228
13	0.363909	0.0549246
14	1.45232	0.0846068
15	1.16877	0.0882277
	3
0	1	0
2.5	3.83835	0.371743
4	3.83026	0.768903
5	2.33291	0.0906715
6	3.01832	0.285729
7	14.6812	1.72469
8	4.91922	0.296718
9	5.45239	0.27334
10	8.55193	2.75273
11	5.12631	0.283492
12	3.98628	0.391392
13	14.6812	1.72469
14	5.31738	0.278449
15	4.78921	0.223829
	4
0	1	0
2.5	3.96639	0.603917
4	5.07976	1.57314
5	3.84112	0.512639
6	5.54528	0.856398
7	12.9024	1.5503
8	3.60013	0.110627
9	6.50316	1.25244
10	10.8292	2.6351
11	6.7222	1.52007
12	1.33333	0.333333
13	7.01905	1.28045
14	8.79969	1.25782
15	2.19726	0.288976
	5
0	1	0
2.5	13.5473	3.00156
4	6.23024	0.461005
5	4.92728	0.334797
6	3.80205	1.18129
7	12.7019	3.03924
8	6.37865	0.573959
9	17.0544	3.6883
10	6.73377	0.657494
11	7.87502	1.55884
12	10.7378	1.1513
13	1.72582	0.368784
14	9.39364	1.40335
15	5.60964	0.442933
