# Supplementary material for: RNA polymerase II stalling at pre-mRNA splice sites is enforced by ubiquitination of the catalytic subunit
Source: eLife. 2017 Oct 13;6:e27082. doi: 10.7554/eLife.27082 (PMC5673307; doi:10.7554/eLife.27082)
Supplement: Figure 3—source data 1. [file elife-27082-fig3-data1.xlsx]

## Sheet: Sheet1
	Rpl19b	Rpl25	Rpl19b SD	Rpl25SD			Act1	Act1SD
1 BY	0.0432765	0.0445067	0.000689167	0.00351122			0.0404567	0.00530925
2 Bre5D	0.0177077	0.03761	0.00197534	0.00241653			0.0738667	0.00596124
	RPL19B	RPL25	Rpl19b SD	Rpl25SD
BRE5	1	1	0.0159247	0.0788919
bre5∆	0.409177	0.845042	0.0456447	0.0542958
