# Supplementary material for: RNA polymerase II stalling at pre-mRNA splice sites is enforced by ubiquitination of the catalytic subunit
Source: eLife. 2017 Oct 13;6:e27082. doi: 10.7554/eLife.27082 (PMC5673307; doi:10.7554/eLife.27082)
Supplement: Figure 3—source data 2. [file elife-27082-fig3-data2.xlsx]

## Sheet: Sheet1
	Rpl19b	Act1	Rpl25	Rpl19b SD	Act1 SD	Rpl25 SD	Rpl19B	Act1	Rpl25	Rpl19b SD	Act1 SD	Rpl25 SD
3 bre5HTP	0.010358	0.06797	0.0312233	0.00110629	0.00273211	0.00155886	1	1	1	0.106805	0.0401958	0.049926
5 Bre5HTPK445E11	0.00707367	0.04678	0.0198667	0.000743324	0.00151615	0.000313422	0.682918	0.688245	0.636276	0.0717633	0.0223061	0.0100381
6 Bre5HTPF453A9	0.00722067	0.0676233	0.02498	0.00078887	0.0103386	0.000610246	0.69711	0.9949	0.800043	0.0761605	0.152105	0.0195445
8 Bre5HTPY421AF453A5	0.00880767	0.0476033	0.02479	0.000732245	0.000200333	0.00025865	0.850325	0.700358	0.793958	0.0706936	0.00294737	0.00828388
9 Bre5HTPY421AR423EF453A4	0.004052	0.02029	0.0119633	0.000595009	0.00254988	0.000841804	0.391195	0.298514	0.383154	0.0574444	0.0375148	0.0269607
