# Supplementary material for: RNA polymerase II stalling at pre-mRNA splice sites is enforced by ubiquitination of the catalytic subunit
Source: eLife. 2017 Oct 13;6:e27082. doi: 10.7554/eLife.27082 (PMC5673307; doi:10.7554/eLife.27082)
Supplement: Figure 4—source data 1. [file elife-27082-fig4-data1.xlsx]

## Sheet: Sheet1
y10	y12	y13		y18					st	stdev
0	0	0		0	untagged	0	177.5	0.0814407	0	0
890	0	1082		614	wild type	2586	2179.5	1	1	0
1746	139	1668		493	bre5Δ	4046	3444	1.58018	1.56458	0.0191772
7567	3083	19326		1314	ubp3Δ	31290	22908	10.5107	12.0998	1.95344
0	0	355		0	untagged	355			0
1136	637	0		0	wild type	1773			1
729	0	1755		358	bre5Δ	2842			1.60293
4666	7211	2076		573	ubp3Δ	14526			8.19289
