# Supplementary material for: RNA polymerase II stalling at pre-mRNA splice sites is enforced by ubiquitination of the catalytic subunit
Source: eLife. 2017 Oct 13;6:e27082. doi: 10.7554/eLife.27082 (PMC5673307; doi:10.7554/eLife.27082)
Supplement: Figure 6—source data 1. [file elife-27082-fig6-data1.xlsx]

## Sheet: Sheet1
	Rpl25	Act1	Rpl19b	Rpl25 SE	Act1 SE	SE
Rpo21HTP	1	1	1	0	0	0
K1246R 8	1.12976	1.22585	1.19557	0.0725421	0.0497104	0.165635
Rpl19b	Ex1	Ex2	Ex3	Ex1 Rpo21HTP=1	Ex2 Rpo21HTP=1	Ex3 Rpo21HTP=1	Mean	SD	SE
Rpo21HTP	0.0106103	0.0218667	0.0164833	1	1	1	1	0	0
K1246R 8	0.0106323	0.0231667	0.02514	1.00207	1.05945	1.52518	1.19557	0.286888	0.165635
Act1	Ex1	Ex2	Ex3	Ex1 Rpo21=1	Ex2 Rpo21=1	Ex3 Rpo21=1	Mean	SD	SE
Rpo21HTP	0.01777	0.0197833	0.0200033	1	1	1	1	0	0
K1246R 8	0.0226667	0.01626	0.0235267	1.27556	0.821904	1.17614	1.22585	0.0703011	0.0497104
Rpl25	ex1	ex2	ex3	ex1 Rpo21=1	ex2 Rpo21=1	ex3 Rpo21=1	Mean	SD	SE
Rpo21HTP	0.02316	0.0326	0.0346767	1	1	1	1	0	0
K1246R 8	0.0285633	0.0322733	0.0404333	1.2333	0.98998	1.16601	1.12976	0.125647	0.0725421
