# Supplementary material for: RNA polymerase II stalling at pre-mRNA splice sites is enforced by ubiquitination of the catalytic subunit
Source: eLife journal article supplement (doi:10.7554/elife.27082), 2017-10-13
Supplement: supp [file Figure2 supplement1 ChIP1_source data.xlsx]

## Sheet: Sheet1
DDCT	Promoter	5'SS	3'SS	E2-1	E2-2			DDCT	Promoter	5'SS	3'SS	E2-1	E2-2
0	2.81539	2.00926	2.23457	3.13834	2.97592			0	1	1	1	1	1
5	5.57897	5.09824	10.5805	7.79924	10.1027			5	1.9816	2.53737	4.7349	2.48515	3.39482
6	8.7949	28.84	12.4666	14.5876	15.455			6	3.12387	14.3535	5.57897	4.64818	5.19335
7	16.037	32.3718	13.3306	14.723	14.1232			7	5.6962	16.1113	5.9656	4.69134	4.74585
7.5	12.2666	7.32756	10.7034	9.42614	16.1859			7.5		3.64689	4.78991	3.00355	5.43897
8	6.77396	8	6.71165	11.9312	12.3805			8	2.40605	3.98156	3.00355	3.80176	4.16024
8.5	3.03143	2.71321	4.0935	6.16172	5.54044			8.5	1.07674	1.35035	1.83189	1.96337	1.86176
9	5.2537	4.46915	4.42804	4.76783	5.29024			9	1.86607	2.22427	1.9816	1.51922	1.77769
10	5.19335	3.66378	6.77396	5.36409	5.66994			10	1.84463	1.82344	3.03143	1.70921	1.90528
10.5	3.88164	5.85634	7.07796	3.8282	6.77396			10.5	1.37872	2.91467	3.16748	1.21982	2.27626
11	9.16838	17.6713	12.7875	11.5514	11.7127			11	3.25653	8.7949	5.72258	3.68075	3.93583
12	11.4716	13.8967	13.3769	13.1167	13.7688			12	4.07462	6.9163	5.98631	4.17951	4.62675
ref values	Promoter	5'SS	3'SS
0	2.60265	1.92307	2.11172
5	4.92493	4.30999	7.05735
6	7.41363	23.9	6.73019
7	12.9319	22.1736	7.10775
7.5	10.1025	6.37079	6.06676
8	5.95192	6.41463	4.21263
8.5	2.78052	2.42395	2.88426
9	4.62378	3.88739	3.10749
10	4.61572	3.22489	4.20718
10.5	3.51237	5.0432	4.33551
11	7.77963	13.0126	6.84292
12	9.57246	10.6036	7.75719
