# Supplementary material for: RNA polymerase II stalling at pre-mRNA splice sites is enforced by ubiquitination of the catalytic subunit
Source: eLife journal article supplement (doi:10.7554/elife.27082), 2017-10-13
Supplement: supp [file Figure2_source data.xls]

## Sheet: GRAPHS-WT
	%input relative to T0							ST ERROR
	PROMOTER	5'SS	3'SS	E2-1	E2-2			PROMOTER	5'SS	3'SS	E2-1	E2-2
0	1	1	1	1	1			0	0	0	0	0
2	0.412601	0.677888	3.76986	2.7809	2.44507			0.0480057	0.054791	0.401794	0.730736	0.383384
4	0.938453	0.553713	1.41992	4.72093	1.01981			0.117975	0.0291085	0.964898	0.864019	0.207709
5	2.37044	1.08859	13.9913	9.59576	8.88684			0.41106	0.0885855	3.65789	1.90462	0.68397
6	4.51889	0.866931	2.52611	2.45152	7.896			0.617254	0.0971382	0.479659	1.46946	0.233993
7	7.24479	1.77709	2.22998	5.4265	6.45567			0.950458	0.168305	0.755488	1.01888	0.166716
8	3.94637	0.95233	10.9626	10.803	9.86741			0.681837	0.100749	3.96712	0.750306	6.41648
9	7.17823	0.755966	3.44175	6.45765	15.3994			1.42902	0.0348342	1.122	1.28154	6.41352
10	9.48798	0.701911	3.13617	4.51561	7.04576			1.47185	0.101537	0.487318	0.148527	1.98609
11	5.5132	0.202373	9.55275	5.32144	10.4021			1.73829	0.051647	3.47446	0.962672	7.45008
12	3.27167	1.72009	0.809744	11.4565	9.3456			0.527636	0.287122	0.378365	1.04573	1.32996
13	7.20615	2.02484	1.08122	5.73207	13.2981			1.15824	0.195325	0.645877	0.445908	6.89094
14	7.62462	2.10162	3.17582	5.59245	3.28047			1.13854	0.298964	1.11886	1.24079	0.322326
15	3.32646	0.755966	0.957341	4.26771	4.88375			0.683781	0.0348342	0.662093	0.643376	3.2334
	1
0	1	0
2	0.412601	0.0480057
4	0.938453	0.117975
5	2.37044	0.41106
6	4.51889	0.617254
7	7.24479	0.950458
8	3.94637	0.681837
9	7.17823	1.42902
10	9.48798	1.47185
11	5.5132	1.73829
12	3.27167	0.527636
13	7.20615	1.15824
14	7.62462	1.13854
15	3.32646	0.683781
	2
0	1	0
2	0.677888	0.054791
4	0.553713	0.0291085
5	1.08859	0.0885855
6	0.866931	0.0971382
7	1.77709	0.168305
8	0.95233	0.100749
9	0.755966	0.0348342
10	0.701911	0.101537
11	0.202373	0.051647
12	1.72009	0.287122
13	2.02484	0.195325
14	2.10162	0.298964
15	0.755966	0.0348342
	3
0	1	0
2	3.76986	0.401794
4	1.41992	0.964898
5	13.9913	3.65789
6	2.52611	0.479659
7	2.22998	0.755488
8	10.9626	3.96712
9	3.44175	1.122
10	3.13617	0.487318
11	9.55275	3.47446
12	0.809744	0.378365
13	1.08122	0.645877
14	3.17582	1.11886
15	0.957341	0.662093
	4
0	1	0
2	2.7809	0.730736
4	4.72093	0.864019
5	9.59576	1.90462
6	2.45152	1.46946
7	5.4265	1.01888
8	10.803	0.750306
9	6.45765	1.28154
10	4.51561	0.148527
11	5.32144	0.962672
12	11.4565	1.04573
13	5.73207	0.445908
14	5.59245	1.24079
15	4.26771	0.643376
	5
0	1	0
2	2.44507	0.383384
4	1.01981	0.207709
5	8.88684	0.68397
6	7.896	0.233993
7	6.45567	0.166716
8	9.86741	2.123
9	15.3994	4.56
10	7.04576	1.98609
11	10.4021	3.2334
12	9.3456	1.32996
13	13.2981	2.9998
14	3.28047	0.322326
15	4.88375	3.2334

## Sheet: GRAPHS BRE5delta
	%input relative to T0							ST ERROR
	PROMOTER	5'SS	3'SS	E2-1	E2-2			PROMOTER	5'SS	3'SS	E2-1	E2-2
0	1	1	1	1	1			0	0	0	0	0
5	1.35684	2.61995	2.00188	1.90159	1.47639			0.356843	0.315468	0.366563	0.293294	0.0552607
6	2.07899	3.34023	4.48204	2.42455	1.06139			0.0874848	0.27966	0.397994	0.577787	0.0866807
7	2.84787	6.41185	4.63084	3.80608	4.53566			0.769627	0.934131	0.415061	0.752908	0.443739
7.5	3.07272	7.49571	4.81018	3.1264	2.2341			1.0506	0.799164	0.464127	0.931593	0.526582
8	5.29484	6.08855	4.98525	2.55641	2.17488			1.26654	1.18044	0.277754	0.460262	0.665873
8.5	5.85355	4.14033	2.62279	3.16176	2.08526			0.372982	0.340856	0.986546	0.906787	0.362323
9	5.61696	6.21614	6.9645	4.69961	2.79502			1.25616	0.864566	1.96722	1.49206	0.574864
10	6.53068	7.06623	8.971	8.98039	3.75161			2.16617	3.41951	0.703709	2.23805	0.0907864
10.5	5.51476	9.06821	5.20423	7.07217	5.50184			1.33902	1.62301	0.337075	1.53273	0.443312
11	3.86904	3.81635	5.25767	1.40171	1.09286			0.522117	0.70881	0.600343	0.308119	0.0998246
12	5.51476	5.97663	6.90627	4.16996	3.37957			1.33902	0.64007	1.04926	0.28774	1.00734
13	5.61696	8.89102	5.96874	3.41758	2.45273			1.25616	0.826394	0.435303	0.783822	1.26818
14	4.45532	4.97286	5.36424	3.94304	2.66925			0.171432	0.741715	0.754908	0.965028	0.75066
		1
	0	1	0
	5	1.35684	0.356843
	6	2.07899	0.0874848
	7	2.84787	0.769627
	7.5	3.07272	1.0506
	8	5.29484	1.26654
	8.5	5.85355	0.372982
	9	5.61696	1.25616
	10	6.53068	2.16617
	10.5	5.51476	1.33902
	11	3.86904	0.522117
	12	5.51476	1.33902
	13	5.61696	1.25616
	14	4.45532	0.171432
		2
	0	1	0
	5	2.61995	0.315468
	6	3.34023	0.27966
	7	6.41185	0.934131
	7.5	7.49571	0.799164
	8	6.08855	1.18044
	8.5	4.14033	0.340856
	9	6.21614	0.864566
	10	7.06623	3.41951
	10.5	9.06821	1.62301
	11	3.81635	0.70881
	12	5.97663	0.64007
	13	8.89102	0.826394
	14	4.97286	0.741715
		3	st error
	0	1	0
	5	2.00188	0.366563
	6	4.48204	0.397994
	7	4.63084	0.415061
	7.5	4.81018	0.464127
	8	4.98525	0.277754
	8.5	2.62279	0.986546
	9	6.9645	1.96722
	10	8.971	0.703709
	10.5	5.20423	0.337075
	11	5.25767	0.600343
	12	6.90627	1.04926
	13	5.96874	0.435303
	14	5.36424	0.754908
		4	st error
	0	1	0
	5	1.90159	0.293294
	6	2.42455	0.577787
	7	3.80608	0.752908
	7.5	3.1264	0.931593
	8	2.55641	0.460262
	8.5	3.16176	0.906787
	9	4.69961	1.49206
	10	8.98039	2.23805
	10.5	7.07217	1.53273
	11	1.40171	0.308119
	12	4.16996	0.28774
	13	3.41758	0.783822
	14	3.94304	0.965028
		5
	0	1	0
	5	1.47639	0.0552607
	6	1.06139	0.0866807
	7	4.53566	0.443739
	7.5	2.2341	0.526582
	8	2.17488	0.665873
	8.5	2.08526	0.362323
	9	2.79502	0.574864
	10	3.75161	0.0907864
	10.5	5.50184	0.443312
	11	1.09286	0.0998246
	12	3.37957	1.00734
	13	2.45273	1.26818
	14	2.66925	0.75066
